# Supplementary material
Source: Springer Nature journal article supplement (https://rdp.sfb1565.uni-goettingen.de/archive/5/36/ca38eb5f5e7b0ece/download)
Supplement: MOESM1 [file 41467_2026_70373_MOESM1_ESM.pdf › 41467_2026_70373_MOESM1_ESM.pdf]

# **CPF-CF terminated snoRNAs shuttle through the cytoplasm via an mRNA guard protein-mediated surveillance mechanism**

- SUPPLEMENTARY INFORMATION -

**Fei Yu<sup>1</sup>, Gianluca Zaccagnini<sup>1</sup>, Yawen Duan<sup>1</sup>, Jan-Phillip Lamping<sup>1</sup>, Sophie Tagnères<sup>2</sup>, Katherine E. Bohnsack<sup>2</sup> and Heike Krebber<sup>1\*</sup>**

<sup>1</sup>Abteilung für Molekulare Genetik, Institut für Mikrobiologie und Genetik, Göttinger Zentrum für Molekulare Biowissenschaften (GZMB), Georg-August Universität Göttingen, Göttingen, Germany

<sup>2</sup> Institut für Molekularbiologie, Universitätsmedizin Göttingen, Göttingen, Germany

\*Correspondence: [heike.krebber@biologie.uni-goettingen.de](mailto:heike.krebber@biologie.uni-goettingen.de)

Short title: snoRNA termination determines shuttling

Keywords: snoRNA / RNA modification / rRNA / transcription termination / NNS / CPF-CF

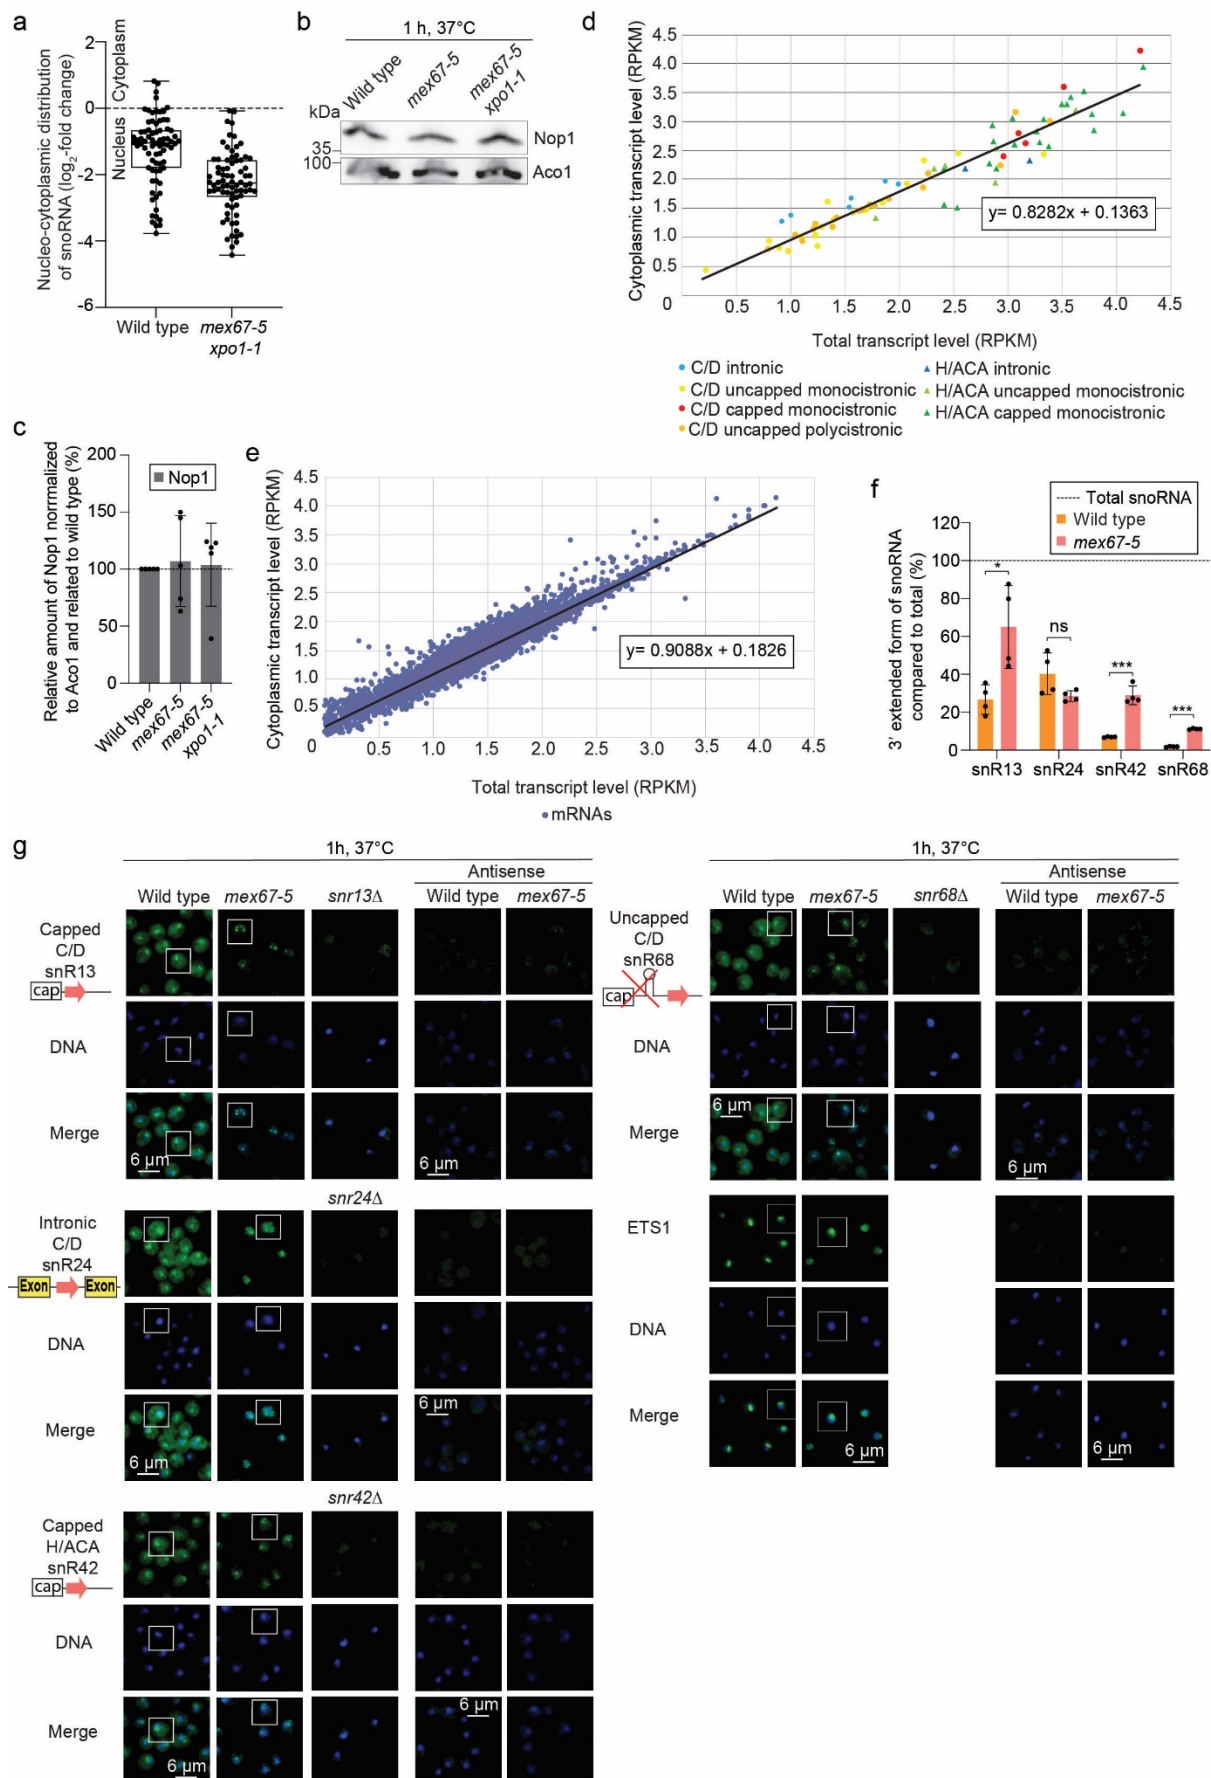

**Supplementary Fig. 1:** (Related to Fig. 1) (a) The log<sub>2</sub>-transformed fold change of the cytoplasmic reads related to total lysate read of snoRNA represents the nucleo-cytoplasmic distribution. The fold change <0 indicates that a snoRNA is more enriched in the nucleus and the fold change >0 indicates that a snoRNA is more enriched in the cytoplasm. Box plot indicates median (centre), 25th-75th percentile (box) and minimum-maximum values (whiskers) as well as all single data points. n=3. (b) Cells of wild type, *mex67-5* and *mex67-5 xpo1-1* were lysed after a temperature shift for 1 h to 37°C. Western blot analysis of Nop1 and mitochondrial Aco1 is shown. kDa=kilodaltons, n=5. (c) Quantification of the relative Nop1 amount normalized to Aco1 using the software Bio-1D is shown. n=5. (d, e) Total and cytoplasmic level of individual snoRNA classified by groups and mRNA obtained from RNA-sequencing data<sup>1</sup> were shown with an equation aligning the distribution. (f) qPCR analysis of total and immature 3'-extended snoRNAs of Fig. 1e was repeated with a standard curve that exhibits the efficiency of each primer pair. After adjusting the Ct value in regard to the primer efficiency, the relative percentage of the 3'-extended snoRNAs is shown against the total snoRNA amounts in wild type and *mex67-5* cells. (g) Overview figure with several cells of Fig. 1f is shown. snoRNA deletion mutants and antisense probes served as negative controls. n indicates the number of biological replicates. Data in bar plots (c, f) are presented as mean +/- SD. Two-tailed student's t-test was used to calculate *p* values. \**p* < 0.05; \*\**p* < 0.01; \*\*\**p* < 0.001. Individual data points are represented by black circles.

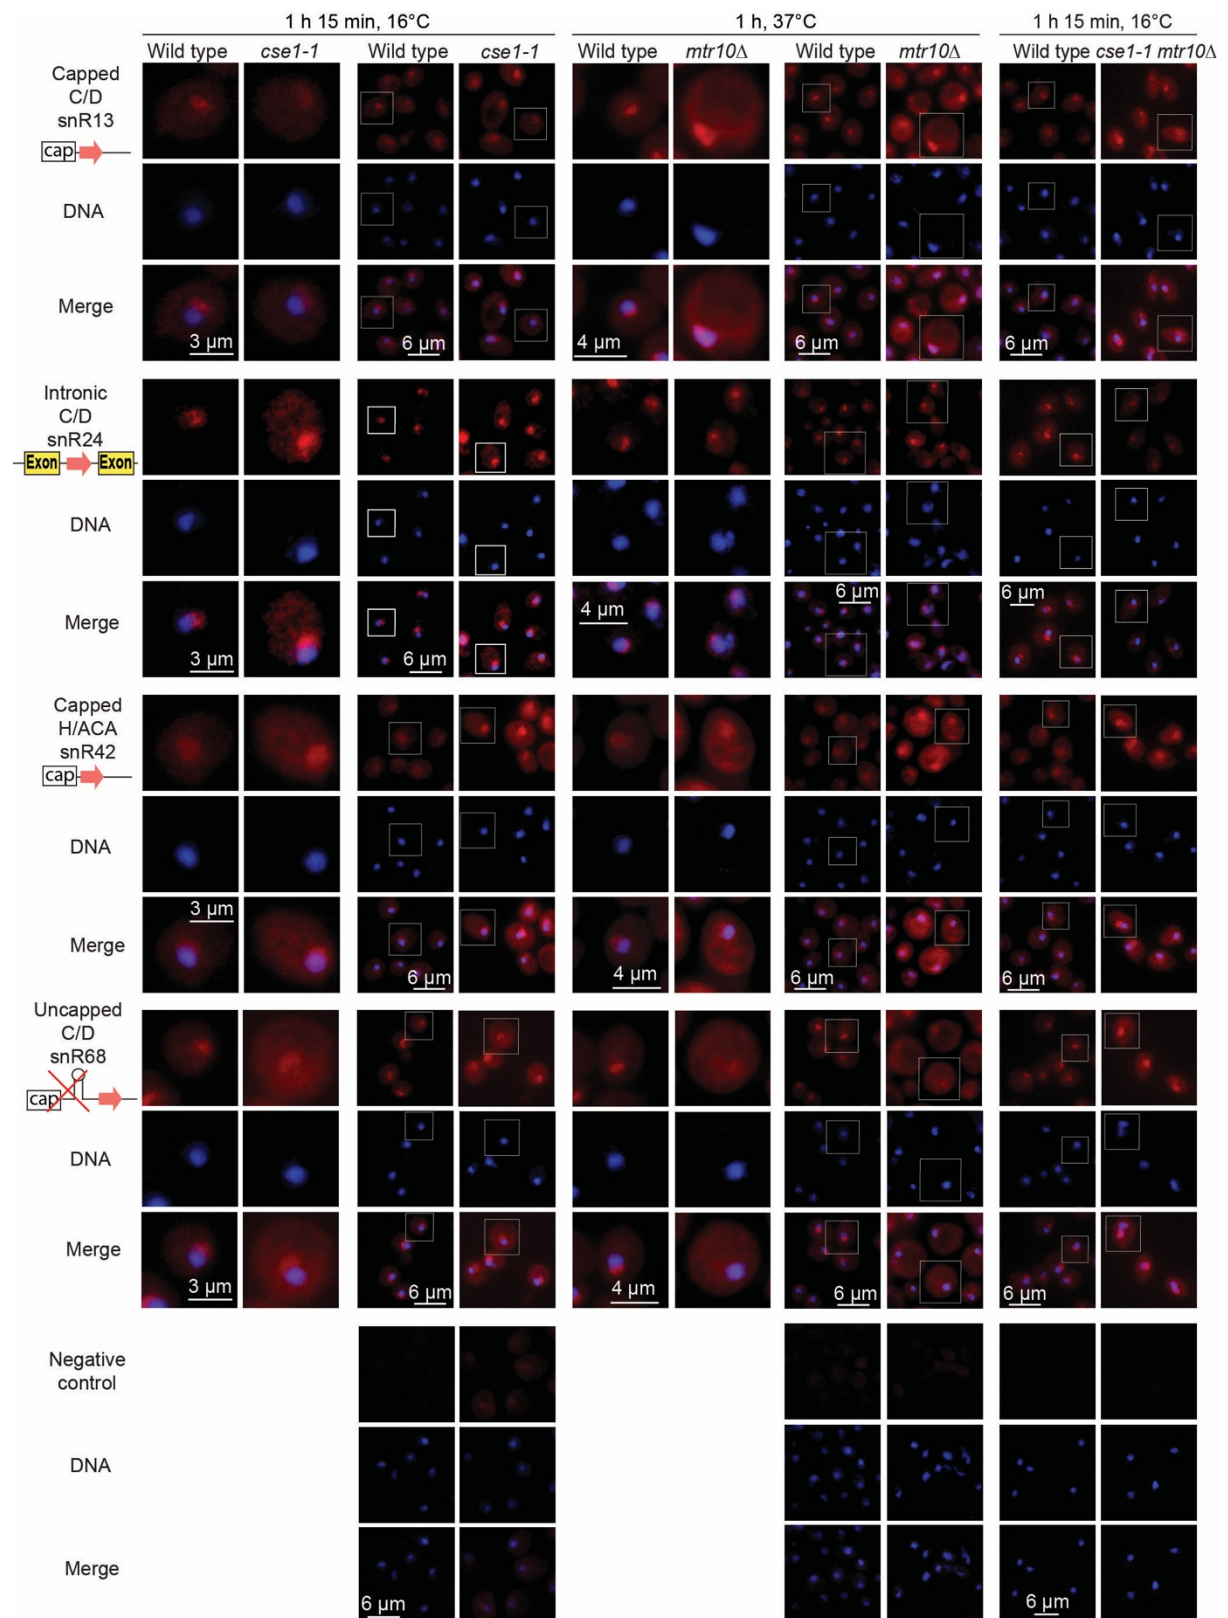

**Supplementary Fig. 2:** (Related to Fig. 2) FISH experiments were performed in wild type and *cse1-1* or *mtr10Δ* with a temperature shift of 1 h 15 min at 16°C in case of *cse1-1* and 1 h at 37°C in case of *mtr10Δ*. ~30 to 50 nt long Cy3 labelled probes were utilized to hybridize with indicated snoRNAs. The DNA was stained with DAPI. n=3. Overview figure with several cells of Fig. 2a is shown.

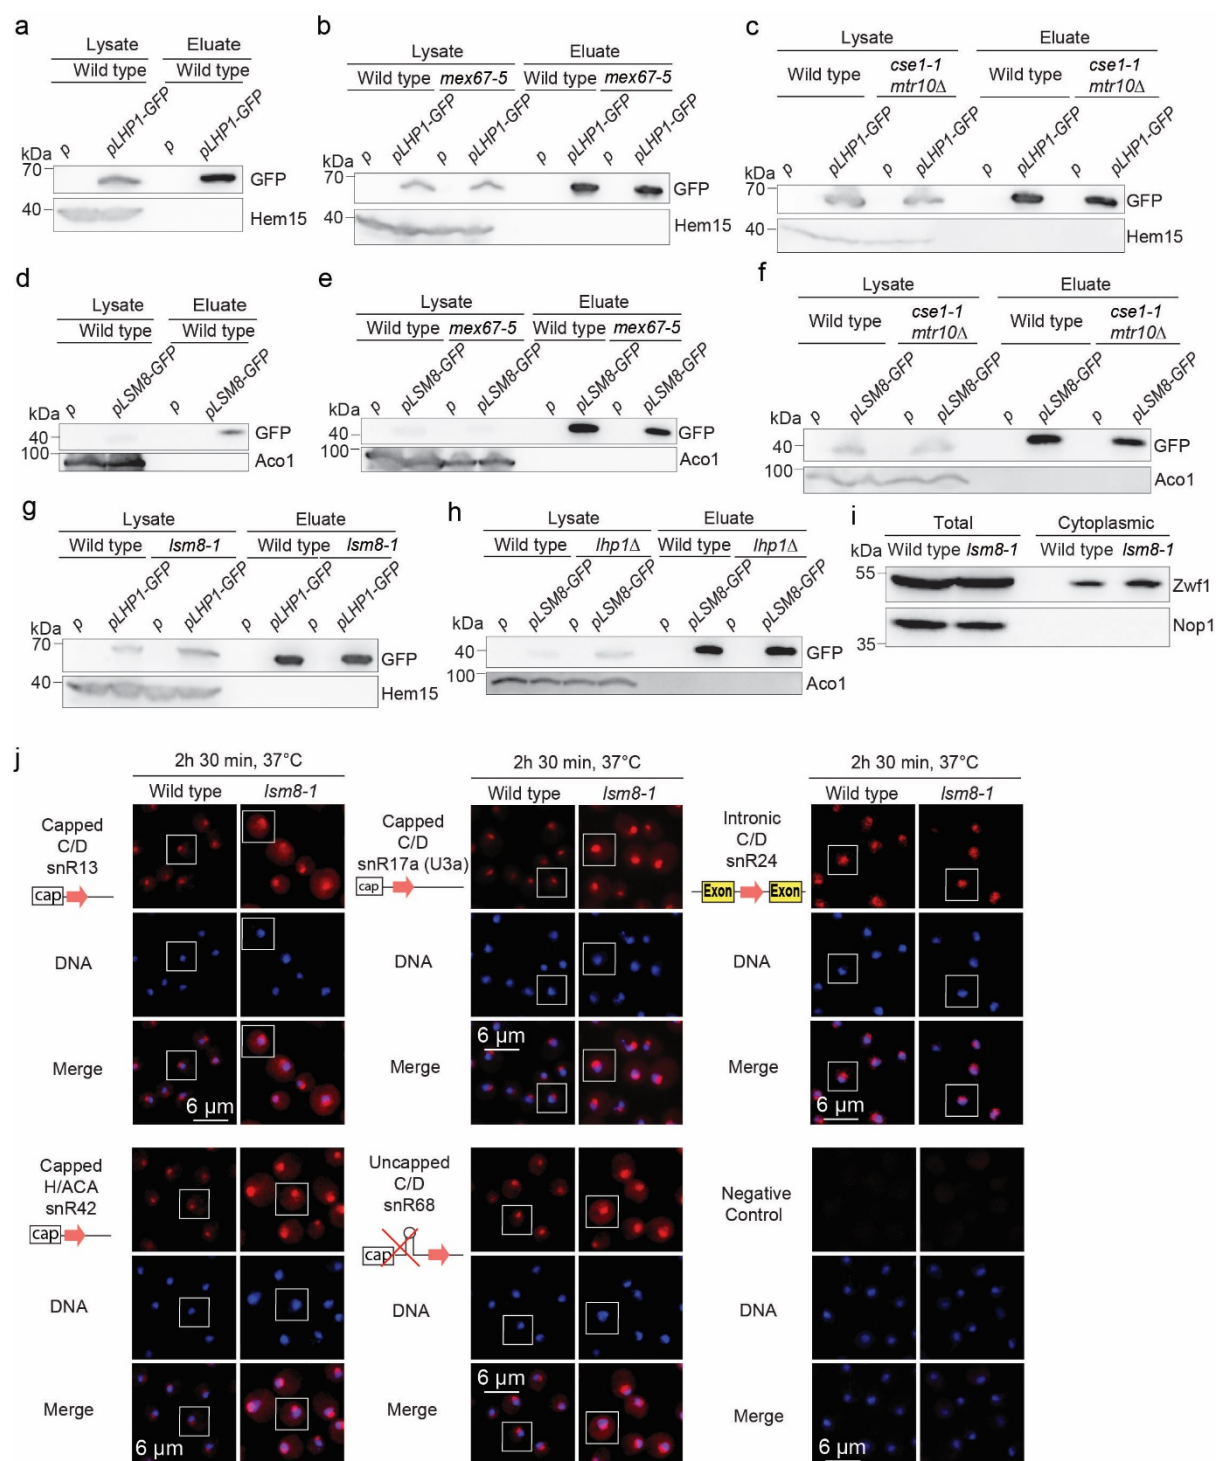

**Supplementary Fig. 3:** (Related to Fig. 3) (a-h) Precipitation of Lhp1 or Lsm8 was successful. Western blot analysis of Figure 3a-f. Hem15 or Aco1 served as a negative control. kDa=kilodaltons. (i) Fraction separation was successful. Western blot analysis of Fig. 3g. Zwf1 served as a cytoplasmic control and Nop1 as nuclear control. kDa=kilodaltons. (j) Overview figure with multiple cells of Fig. 3h is shown.



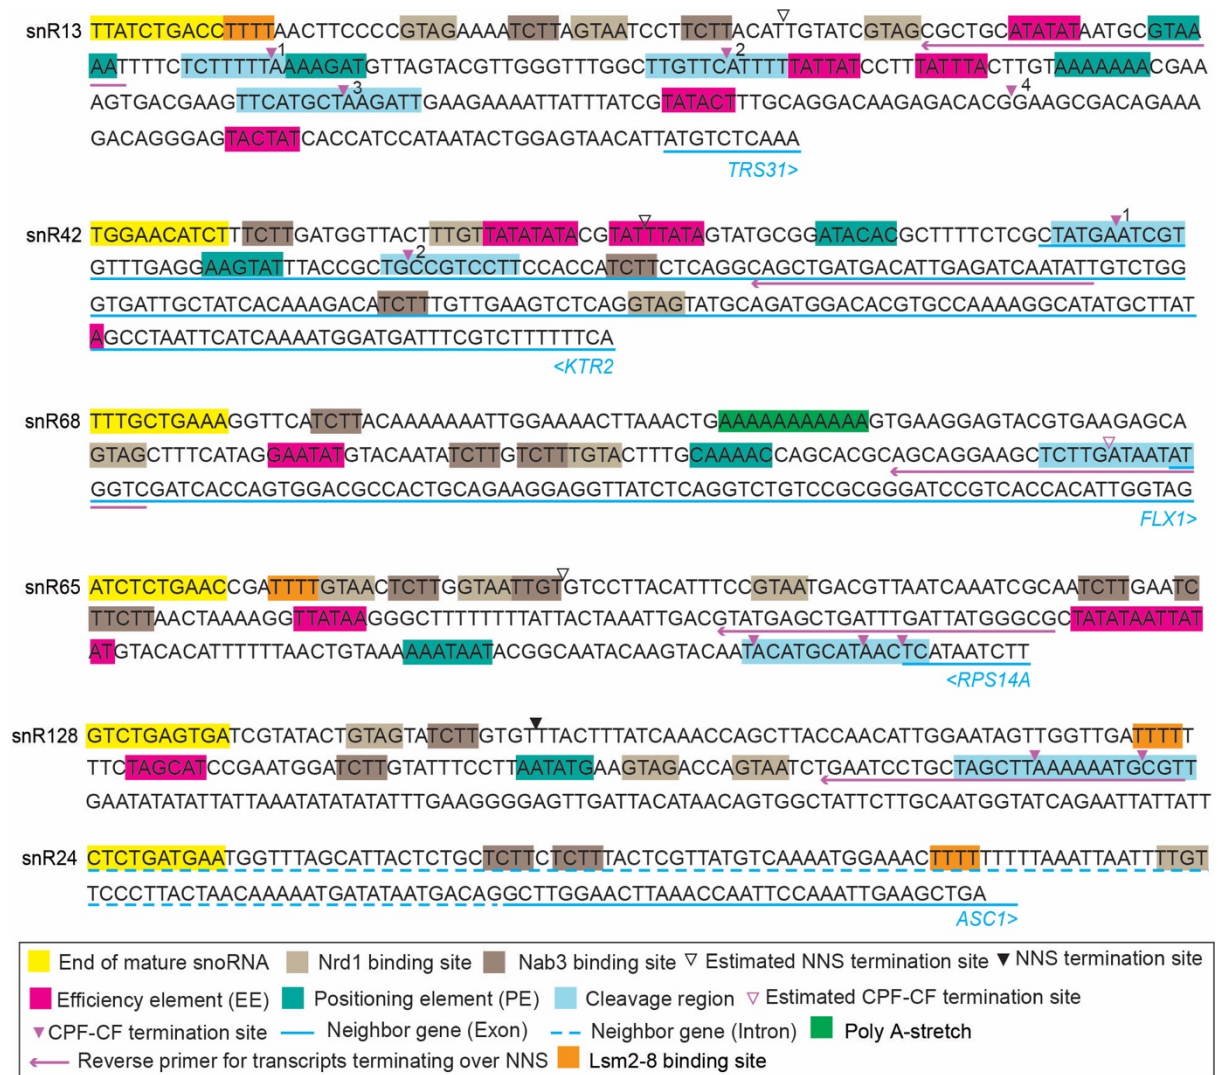

**Supplementary Fig. 4:** (Related to Fig. 4) Detail transcription termination map of snoRNAs used in this study. Sequence after the mature snoRNA end is shown and the motifs of NNS or CPF-CF termination as well as the assumed or identified termination sites were indicated.

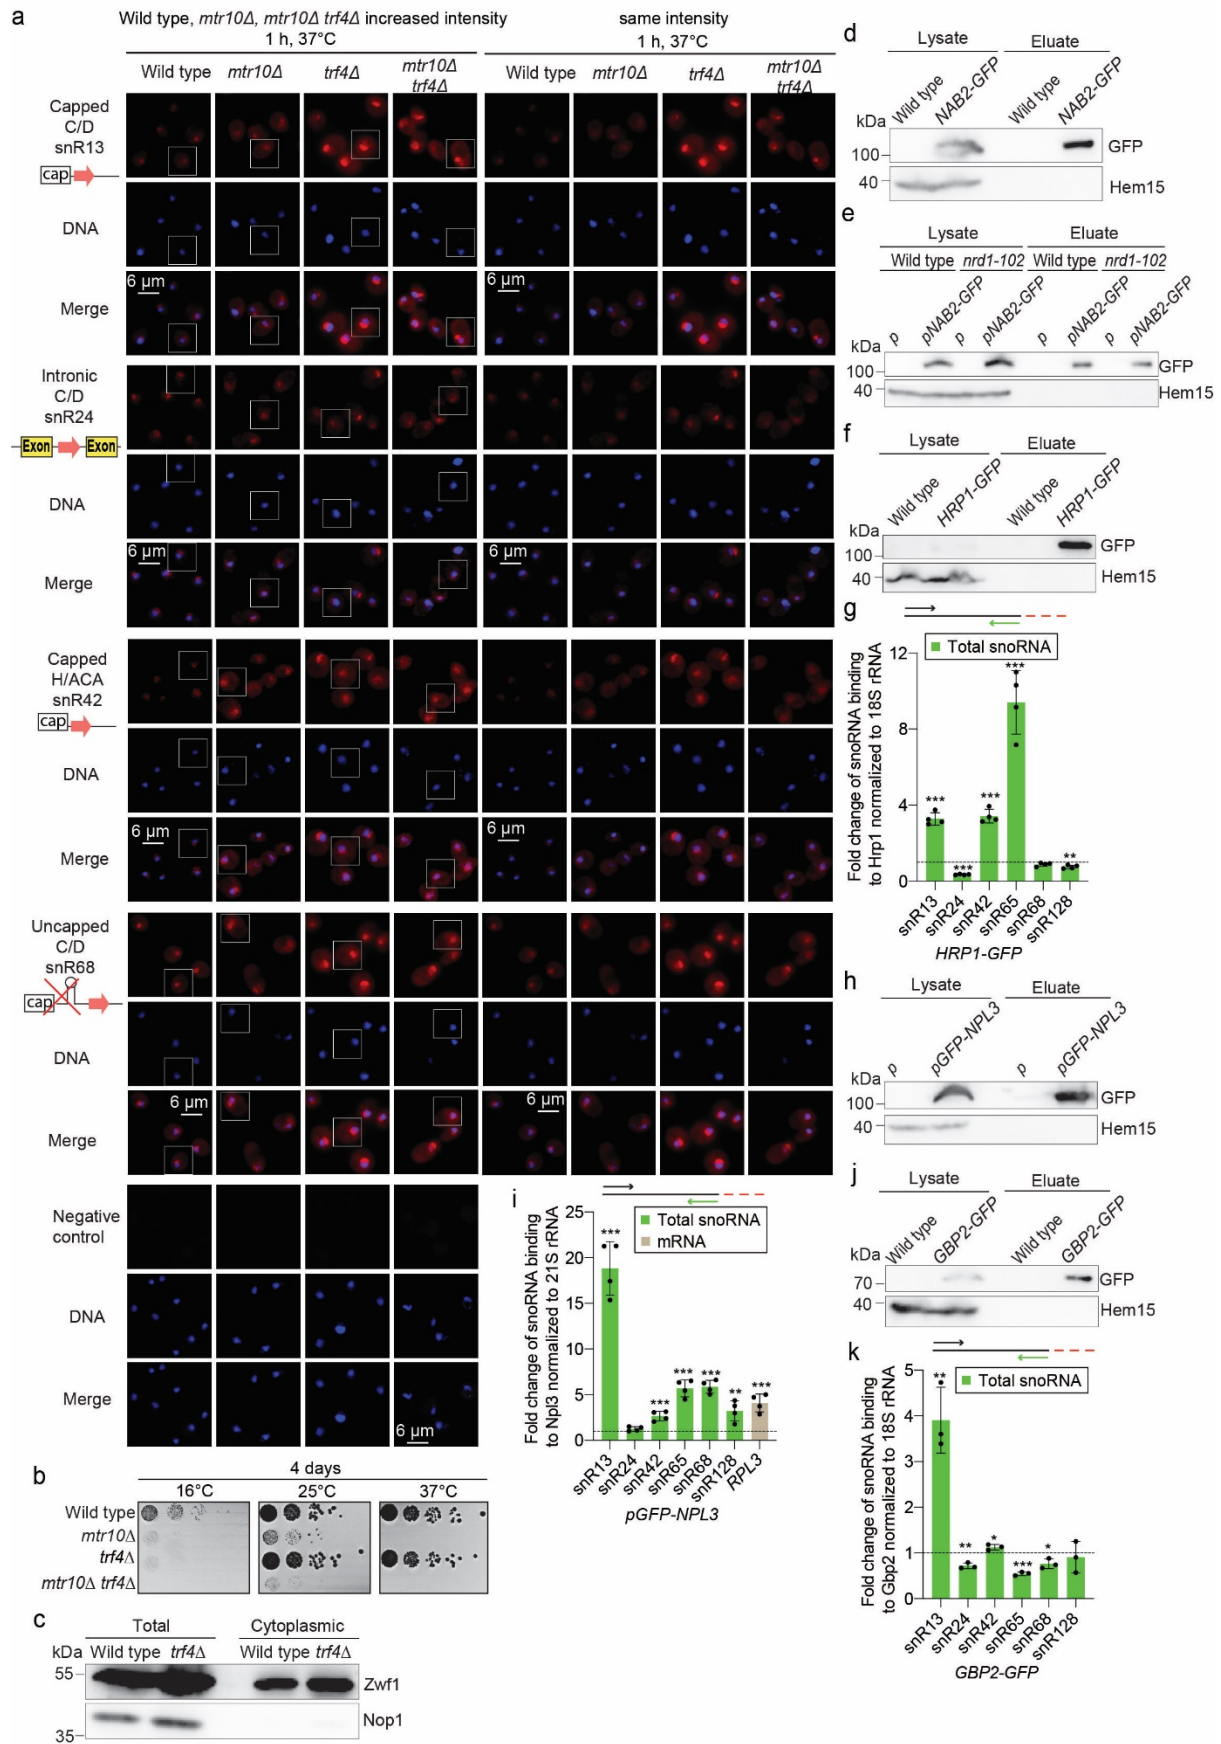

**Supplementary Fig. 5:** (Related to Fig. 4) (a) Overview figure with several cells of Fig. 4b is shown including figure with the same intensity. (b) *TRF4* shows a genetic interaction with *MTR10* encoding the import receptor. 10-fold serial dilutions of the indicated strains were spotted onto YPD plates that were incubated at the indicated temperatures for four days. n=3. (c) Fraction separation was successful. Western blot analysis of Fig. 4e. Zwfl served as a cytoplasmic control and Nop1 as nuclear control. kDa=kilodaltons. (d, e) Precipitation of Nab2 was successful. Western blot analysis of Fig. 4h and 4i. Hem15 served as a negative control. kDa=kilodaltons. (f-k) SnoRNAs also bind to other guard proteins such as Hrp1, Npl3 and Gbp2. RIP experiments pulling down GFP-tagged Hrp1, Npl3 and Gbp2 were carried out in wild type. (f, h, j) Western blot analysis validates the precipitation of Hrp1(f), Npl3(h) and Gbp2(j) Hem15 served as a negative control. kDa=kilodaltons. (g, i, k) qPCR amplifying the total snoRNA is shown and the binding is normalized either to the 18S rRNA or 21S rRNA in the case of Npl3. (f, g) n=4. (h, i) n=4. (j, k) n=3. n indicates the number of biological replicates. Data in bar plots (g, i, k) are presented as mean  $\pm$  SD. Two-tailed student's t-test was used to calculate *p* values. \**p* < 0.05; \*\**p* < 0.01; \*\*\**p* < 0.001. Individual data points are represented by black circles.



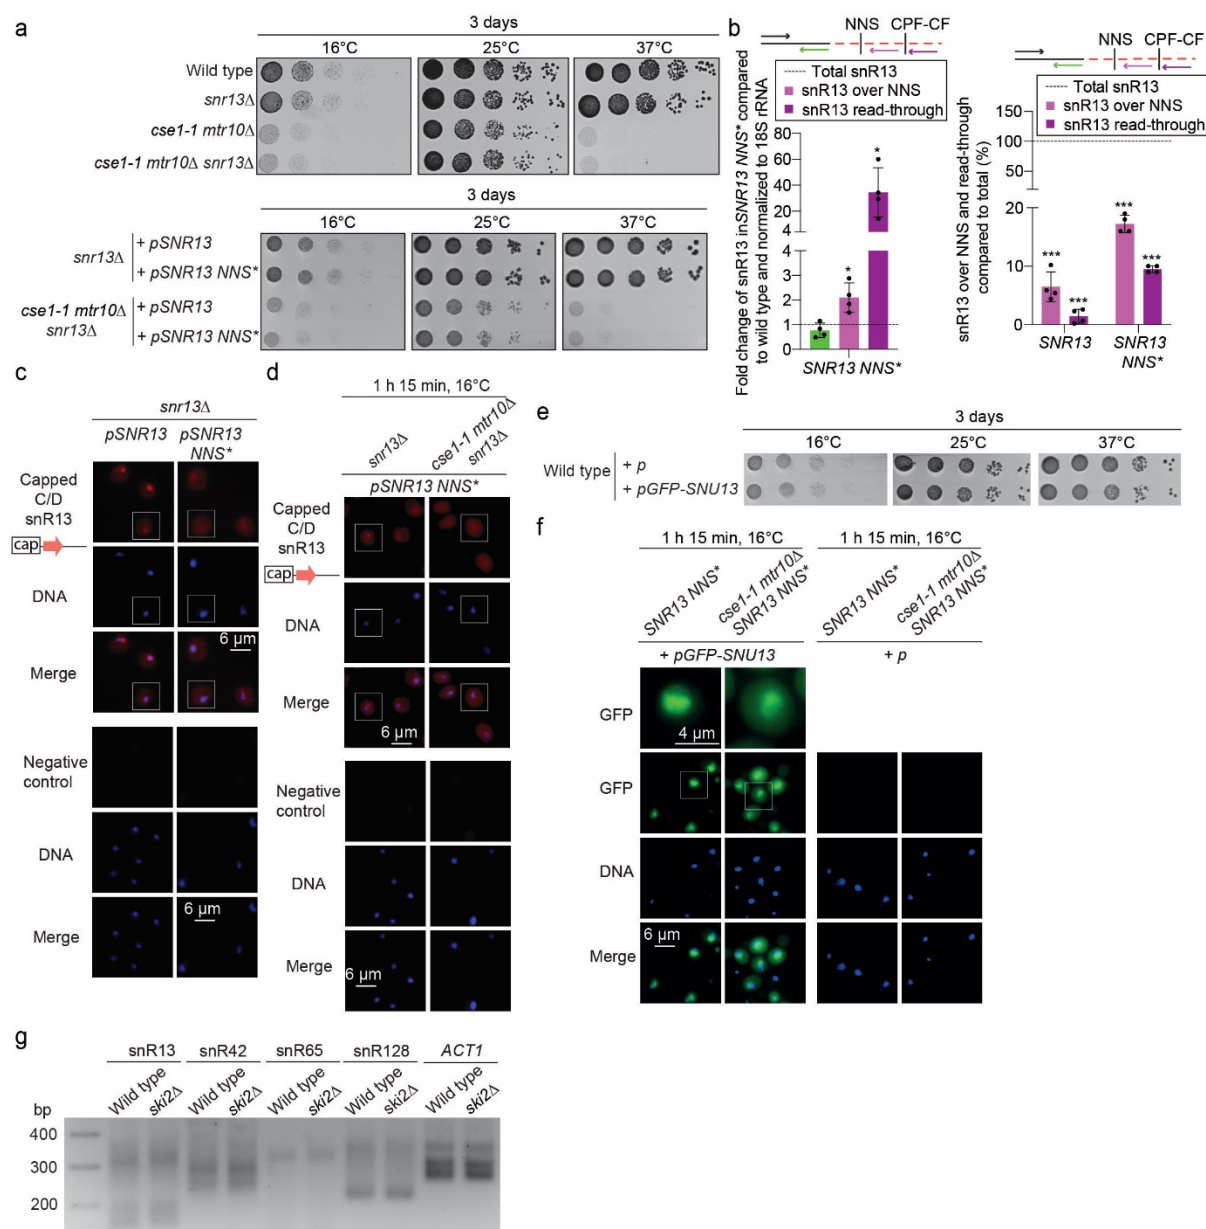

**Supplementary Fig. 6:** (Related to Fig. 5 and 6) (a) 10-fold serial dilutions of the indicated strains were spotted onto YPD plates or -ura plates that were incubated at the indicated temperatures for three days.  $n=3$ . (b) Total, CPF-CF terminated (over NNS) and read-through snR13 in *SNR13* and *SNR13-NNS\** were quantified in qPCRs (left) and the relative amounts of CPF-CF terminated (over NNS) and read-through snR13 were compared to the total snR13 (right).  $n=4$ . (c, d) Overview figure for Fig. 5d and 5e is shown. (e) Wild type cells containing either empty vector (pHK85) or N-terminal GFP tagged Snu13 plasmid (pHK2159) were spotted in 10-fold serial dilution onto -his plates and incubated at the indicated temperatures for three days.  $n=3$ . (f) GFP microscopy experiments were conducted in *SNR13 NNS\** expressed in the wild type or the *cse1-1 mtr10Δ* strains upon a temperature shift for 1 h 15 min to 16°C. The DNA was stained with DAPI.  $n=3$ . (g) Total RNA isolated from wild type and *ski2Δ* was used for 3'-end PCR. *ACT1* served as control. bp=base pairs,  $n=3$ .  $n$  indicates the number of biological replicates. Data in bar plots (b) are presented as mean  $\pm$  SD. Two-tailed student's t-test was used to calculate  $p$  values. \* $p < 0.05$ ; \*\* $p < 0.01$ ; \*\*\* $p < 0.001$ . Individual data points are represented by black circles.

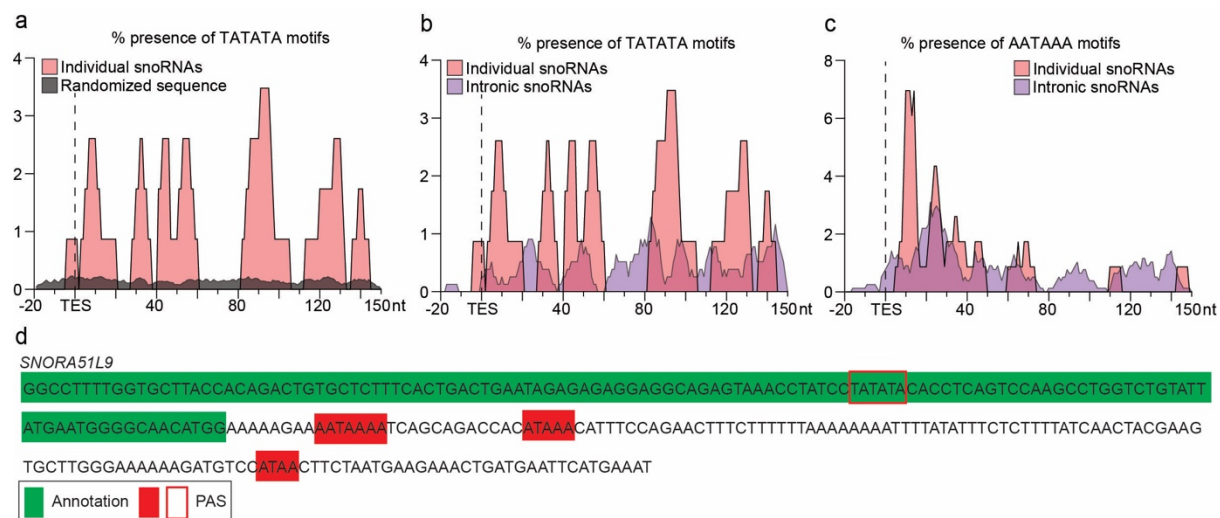

**Supplementary Fig. 7:** (Related to Fig. 7) (a) Percentual presence of TATATA motifs is shown around the transcript end site (-20 and +150 nt) for individual snoRNAs compared to a set of random sequences. (b) Percentual presence of AATAAA motifs is shown around the transcript end site (-20 and +150 nt) for individual and intronic snoRNAs. (c) Percentual presence of TATATA motifs is shown around the transcript end site (-20 and +150 nt) for individual and intronic snoRNAs. (d) Sequence of the mature SNORA51L9 is shown in green together with its downstream terminator sequence. Putative PAS sites are marked in red.

**Supplementary Table 1: Yeast strains**

| Number  | Name                        | Genotype                                                                                    | Source     |
|---------|-----------------------------|---------------------------------------------------------------------------------------------|------------|
| HKY36   | Wild type                   | <i>MATα ura3-52 leu2Δ1 his3Δ200</i>                                                         | 2          |
| HKY82   | <i>MTR10</i> shuffle        | <i>MATα ura3Δ0 leu2Δ0 his3Δ1 trp1Δ0 ade2Δ0 mtr10::HIS3 + pRS316-URA3-MTR10</i>              | 3          |
| HKY82   | <i>cse1-1</i>               | <i>MATα mtr10::HIS3 ura3Δ0; leu2Δ0 trp1Δ0 his3Δ1 ade2Δ0</i>                                 | 4          |
| HKY314  | Wild type                   | <i>MATα ura3Δ0 leu2Δ0 his3Δ met15Δ0</i>                                                     | Euroscarf  |
| HKY332  | <i>nrd1-102</i>             | <i>MATα nrd1::kanMX ura3Δ0 his3Δ1 leu2Δ0 met15Δ0 +pnrd1-102 LEU2 CEN</i>                    | 5          |
| HKY502  | <i>GBP2-GFP</i>             | <i>MATα ura3Δ0 leu2Δ0 his3Δ1 met15Δ0 GBP2-GFP:HIS3MX6</i>                                   | Invitrogen |
| HKY644  | <i>mex67-5</i>              | <i>MATα mex67::HIS3 ura3Δ0 leu2Δ0 his3Δ1 trp1Δ0 ade2Δ0 + pUN100-mex67-5 LEU2 CEN</i>        | 6          |
| HKY682  | <i>npl3Δ</i>                | <i>MATα ura3Δ0 leu2Δ0 his3Δ1 npl3::KanMX4</i>                                               | 7          |
| HKY1112 | <i>trf4Δ</i>                | <i>MATα ura3Δ0 leu2Δ0 his3Δ1 met15Δ0 trf4::kanMX4</i>                                       | Euroscarf  |
| HKY1266 | <i>MEX67-GFP</i>            | <i>MATα ura3Δ0 leu2Δ0 his3Δ1 met15Δ0 MEX67-GFP:HIS3MX6</i>                                  | Invitrogen |
| HKY1475 | <i>NAB2-GFP</i>             | <i>MATα ura3Δ0 leu2Δ0 his3Δ1 met15Δ0 NAB2-GFP:HIS3MX6</i>                                   | Invitrogen |
| HKY1610 | <i>cdc28-13</i>             | <i>MATα ura3Δ0 leu2Δ0 his3Δ1 met15Δ0 cdc28-13::kanMX4</i>                                   | 8          |
| HKY1854 | <i>lsm8-1</i>               | <i>MATα ura3Δ0 leu2Δ0 his3Δ1 trp1Δ0 lys2Δ0 lsm8-1</i>                                       | 9          |
| HKY1861 | <i>HRP1-GFP</i>             | <i>MATα ura3Δ0 leu2Δ0 his3Δ1 met15Δ0 HRP1-GFP:HIS3MX6</i>                                   | Invitrogen |
| HKY1906 | <i>lhp1Δ</i>                | <i>MATα ura3Δ0 leu2Δ0 his3Δ1 lhp1::kanMX4</i>                                               | Euroscarf  |
| HKY2035 | <i>cft2-1</i>               | <i>MATα cft2-1::kanMX4 ura3Δ0 leu2Δ0 his3Δ1 met15Δ0</i>                                     | Euroscarf  |
| HKY2087 | <i>cse1-1 mtr10Δ</i>        | <i>MATα ura his cse1-1 mtr10::kanMX4</i>                                                    | 10         |
| HKY2328 | <i>snr13Δ</i>               | <i>MATα ura3-52 leu2Δ1 his3Δ200 snr13Δ</i>                                                  | This study |
| HKY2349 | <i>snr42Δ</i>               | <i>MATα ura3-52 leu2Δ1 his3Δ200 snr42Δ</i>                                                  | This study |
| HKY2524 | <i>NAB2-GFP snr13Δ</i>      | <i>MATα ura3Δ0 leu2Δ0 his3Δ1 met15Δ0 NAB2-GFP:HIS3MX6 snr13Δ</i>                            | This study |
| HKY2525 | <i>HRP1-GFP snr13Δ</i>      | <i>MATα ura3Δ0 leu2Δ0 his3Δ1 met15Δ0 HRP1-GFP:HIS3MX6 snr13Δ</i>                            | This study |
| HKY2528 | <i>mex67-5 snr13Δ</i>       | <i>MATα mex67::HIS3 ura3Δ0 leu2Δ0 his3Δ1 trp1Δ0 ade2Δ0 snr13Δ + pUN100-mex67-5 LEU2 CEN</i> | This study |
| HKY2565 | <i>cse1-1 mtr10Δ snr13Δ</i> | <i>MATα ura his cse1-1 mtr10::kanMX4 snr13Δ</i>                                             | This study |
| HKY2829 | <i>mtr10Δ trf4Δ</i>         | <i>MATα ura3Δ0 leu2Δ0 his3Δ1 ade2Δ0 mtr10::HIS3 trf4::kanMX4</i>                            | This study |
| HKY2962 | <i>snr24Δ</i>               | <i>MATα leu2Δ1 his3Δ200 snr24::URA3</i>                                                     | This study |
| HKY2972 | <i>snr68Δ</i>               | <i>MATα leu2Δ1 his3Δ200 snr68::URA3</i>                                                     | This study |

**Supplementary Table 2: Plasmids**

| Number | Genotype                          | Source |
|--------|-----------------------------------|--------|
| pHK85  | <i>HIS3; CEN; AMP<sup>R</sup></i> | 11     |
| pHK86  | <i>TRP1; CEN; AMP<sup>R</sup></i> | 11     |
| pHK87  | <i>LEU2; CEN; AMP<sup>R</sup></i> | 11     |

|         |                                                                                                                                                            |            |
|---------|------------------------------------------------------------------------------------------------------------------------------------------------------------|------------|
| pHK88   | <i>URA3; CEN; AMP<sup>R</sup></i>                                                                                                                          | 11         |
| pHK356  | <i>URA3 CEN AMP<sup>R</sup> P<sub>NAB2</sub>: NAB2-GFP</i>                                                                                                 | This study |
| pHK418  | <i>P<sub>NPL3</sub>: GFP-NPL3; LEU2; CEN; AMP<sup>R</sup></i>                                                                                              | 12         |
| pHK1711 | <i>P<sub>LSM8</sub>: LSM8-GFP; URA3; CEN; AMP<sup>R</sup></i>                                                                                              | 13         |
| pHK1748 | <i>P<sub>LHP1</sub>: LHP1-GFP; URA3; CEN; AMP<sup>R</sup></i>                                                                                              | 13         |
| pHK1894 | <i>P<sub>SNR13</sub>: SNR13; CEN; URA3; AMP<sup>R</sup></i>                                                                                                | This study |
| pHK1917 | <i>P<sub>SNR13</sub>: SNR13, GTAG -&gt; GCCG (139/140*), GTAA -&gt; GCCA (139/140*), TCTT -&gt; TACT (147/148*) (160/161*); CEN; URA3; AMP<sup>R</sup></i> | This study |
| pHK2159 | <i>P<sub>SNU13</sub>: GFP-SNU13; HIS3; CEN; AMP<sup>R</sup></i>                                                                                            | This study |
| pHK2235 | <i>P<sub>SNU13</sub>: GFP-SNU13; TRP1; CEN; AMP<sup>R</sup></i>                                                                                            | This study |

**Supplementary Table 3: Primers for cloning**

| Construct          | Number | Sequence                                                                          | Name                                       |
|--------------------|--------|-----------------------------------------------------------------------------------|--------------------------------------------|
| pHK1711            | HK3731 | 5'-CACAATATTTCAAGCTATACCAAGCATACAA<br>TAAGCATCGATGTCAGCCACCTTGAAA-3'              | <i>LSM8</i> forward                        |
|                    | HK3732 | 5'-CAGTGAAGAGTTCTTCTCCTTTGCTAGCCATA<br>GCTCGAGATTTTGTCTTTGATTTCGTACACTT-3'        | <i>LSM8</i> reverse                        |
|                    | HK3880 | 5'-GTCGCGCCATTTCGCCATTTCAGGCTGCGCAACT<br>GTTGGGAATTCCGTCTCATGCTGCTT-3'            | <i>LSM8</i> promoter<br>forward            |
|                    | HK3881 | 5'-CAACTCTTTTATTTAAGTAGTCTTTCAAGGTG<br>GCTGACATGGTGCACGATAGTGTGTTCT-3'            | <i>LSM8</i> promoter<br>reverse            |
| pHK1748            | HK3747 | 5'-CACAATATTTCAAGCTATACCAAGCATACAATA<br>AGCATCGATGTCTGAAAAACCACAACAAGAG-3'        | <i>LHP1</i> forward                        |
|                    | HK3748 | 5'-CAGTGAAGAGTTCTTCTCCTTTGCTAGCCATA<br>GCTCGAGACTCCTTGTGCTCCTCATCG-3'             | <i>LHP1</i> reverse                        |
|                    | HK3905 | 5'-GTCGCGCCATTTCGCCATTTCAGGCTGCGCAACTG<br>TTGGGAA-3'                              | <i>LHP1</i> promoter<br>forward            |
|                    | HK3906 | 5'-GTGGTTTCTCTTGCTCCTCTTGTTGTGGTTTTTCA<br>GACATTACTTCTTTGCAGATGCTACTTTAG-3'       | <i>LHP1</i> promoter<br>forward            |
| pHK1894<br>pHK1917 | HK4414 | 5'-TCTATACTTTAACGTCAAGGAGAAAAAACTATA<br>GAATTCAAGGAAGTTTTTCCCTTTTATATG -3'        | <i>SNR13</i> forward                       |
|                    | HK4415 | 5'-ACAAAAGCTGGGTACCTTCACATGTTCCGCA<br>GATTTTGATACTCCAGTATTATGGATGG -3'            | <i>SNR13</i> reverse                       |
|                    | HK4601 | 5'-CTACCTTTTTTTACTTTTATCTGACCTTTTAAC<br>TTCCCCGCCGAAAATACTAGTAATCCTTCT-3'         | <i>SNR13</i><br>1. NNS mutation<br>forward |
|                    | HK4602 | 5'-CGCATTATATATGCAGCGCTACGATACAATG<br>TAAGAAGGATTACTAGTATTTTCGGC-3'               | <i>SNR13</i><br>1. NNS mutation<br>reverse |
|                    | HK4669 | 5'-TGACCTTTTAACTTCCCCGCCGAAAATACTAG<br>CCATCCTTACTACATTGTAT-3'                    | <i>SNR13</i><br>2. NNS mutation<br>forward |
|                    | HK4670 | 5'-GAAAATTTTACGCATTATATATGCAGCGCTA<br>CGATACAATGTAGTAAGGATGGCTAGTAT-3'            | <i>SNR13</i><br>2. NNS mutation<br>reverse |
|                    | HK4653 | 5'-GTGGCGGCCGCTCTAGATGATTGTATTGTCAT<br>TGTAGGAGGT-3'                              | <i>SNR13</i> promoter<br>forward           |
|                    | HK4654 | 5'-ACTCATATTCATCATATAAAAAGGAAAAAACTTC<br>CTTGAATTCGACCTTTAAAAAATCCAATTAACA-3'     | <i>SNR13</i> promoter<br>reverse           |
| pHK2159            | HK6213 | 5'- TGGCGGCCGCTCTAGAACTAGTGGATCCCCCGG<br>GCTGCAGGCAGCTTCTGAATCACTAAAG-3'          | <i>SNU13</i> promoter<br>forward           |
|                    | HK6214 | 5'-GACAACTCCAGTGAAGAGTTCTTCTCCTTTGCTA<br>GCCATTTTAAATATAGTTTTTATAGTATGAAATCTGG-3' | <i>SNU13</i> promoter<br>reverse           |
|                    | HK6215 | 5'- TGGGATTACACATGGCATGGATGAACATACAAA<br>GGATCCATGTCTGCCCCAAACCCAAA-3'            | <i>SNU13</i> forward                       |

|         |        |                                                                                   |                      |
|---------|--------|-----------------------------------------------------------------------------------|----------------------|
|         | HK6216 | 5'-TACCGGGCCCCCCTCGAGGTCGACGGTATCGAT<br>AAGCTTATTCGGTTACCTAATAAGATAATCTC-3'       | <i>SNU13</i> reverse |
| pHK2235 | HK6683 | 5'- ACCATAACCACCTTTTCTTTTCTATTACTCTTGGC<br>CTCCTACGACATTACTATATATATAATATAGGAAG-3' | <i>TRP1</i> forward  |
|         | HK6684 | 5'- ATTCACACCGCATACTGCAGCTTTAAATAATCG<br>GTGTCACATTCTTAGCATTCTTGACG-3'            | <i>TRP1</i> reverse  |

**Supplementary Table 4: Primers for knock out generation**

| Strains            | Number | Sequence                                                                     | Name                        |
|--------------------|--------|------------------------------------------------------------------------------|-----------------------------|
| HKY2328<br>HKY2565 | HK4188 | 5'-AAAATTTTACGCATTATATATGCAGCGCTACGA<br>TACAATGCCAGTCACGACGTTGTAAAACG-3'     | <i>SNR13</i><br>knockout FW |
|                    | HK4229 | 5'-GCCATATTGGTCGTAACACAAAAATGCCCAATGG<br>AGCCTGGGGATCTATCGATCTCGACAACCCG-3'  | <i>SNR13</i><br>knockout RV |
| HKY2524<br>HKY2525 | HK5005 | 5'-GCCATATTGGTCGTAACACAAAAATGCCCAAT<br>GGAGCCTGGCTATCGATCTCGACAACCCCTCG-3'   | <i>SNR13</i><br>knockout FW |
|                    | HK5006 | 5'-AAAATTTTACGCATTATATATGCAGCGCTACG<br>ATACAATGGTGAATTCGAGCTCGGTACCCG-3'     | <i>SNR13</i><br>knockout RV |
| HKY2528            | HK5009 | 5'-GCCATATTGGTCGTAACACAAAAATGCCCAATGG<br>AGCCTGGCGACAACCCCTCGAGGATCT-3'      | <i>SNR13</i><br>knockout FW |
|                    | HK5010 | 5'-AAAATTTTACGCATTATATATGCAGCGCTACGAT<br>ACAATGGTAAAACGACGGCCAGTGAA-3'       | <i>SNR13</i><br>knockout RV |
| HKY2962            | HK6445 | 5'-CAATCGAGTAGAAGAAGAAAAAGTGGATTTGT<br>GTATGCCATGGATCTATCGATCTCGACAACCCG -3' | <i>SNR24</i><br>knockout FW |
|                    | HK6446 | 5'-ACATAACGAGTAAAGAGAAGAGCAGAGTAATG<br>CTAAACCACCCAGTCACGACGTTGTAAAACG-3'    | <i>SNR24</i><br>knockout RV |
| HKY2972            | HK6447 | 5'-TTTCTTTTCAGTTTCCTCCGTTTATTTTTTGT<br>TGGATTGGATCTATCGATCTCGACAACCCG-3'     | <i>SNR68</i><br>knockout FW |
|                    | HK6448 | 5'-TTTTTCAGTTTAAAGTTTCCAATTTTTTTGTAAAG<br>ATGAACCCCCAGTCACGACGTTGTAAAACG-3'  | <i>SNR68</i><br>knockout RV |

**Supplementary Table 5: Primers for qPCR**

| Target                          | Number | Sequence                                           | Name                                    |
|---------------------------------|--------|----------------------------------------------------|-----------------------------------------|
| <i>SNR13</i>                    | HK3530 | 5'-GAAGTTTTTTCCTTTTTATATGATGAA-3'                  | Forward                                 |
|                                 | HK3531 | 5'-GGTCAGATAAAAAGTAAAAAAGGTAGC-3'                  | Reverse                                 |
|                                 | HK3533 | 5'-TTACTAAGATTTTCTACGGGGAAG-3'                     | Reverse 3'-extended<br>unprocessed form |
|                                 | HK5084 | 5'- ATTTTACGCATTATATATGCAGCG-3'                    | Reverse over NNS<br>termination site    |
|                                 | HK5013 | 5'-CGCTTCCGTGTCTCTTGTCC-3'                         | Reverse read-through                    |
| <i>SNR17a</i><br>( <i>U3a</i> ) | HK3542 | 5'-GTTGATGAGTCCATAACCTTT-3'                        | Forward                                 |
|                                 | HK3545 | 5'-CAATTTAGAAAAGGAAAAAAGTGG-3'                     | Reverse 3'-extended<br>unprocessed form |
| <i>SNR24</i>                    | HK2797 | 5'-TCAAATGATGTAATAACATATTTGCTACTTC-<br>3'          | Forward                                 |
|                                 | HK2798 | 5'-CATCAGAGATCTTGGTGATAATTGG-3'                    | Reverse                                 |
|                                 | HK3405 | 5'-GAGAAGAGCAGAGTAATGCTAAACC-3'                    | Reverse 3'-extended<br>unprocessed form |
| <i>SNR42</i>                    | HK2799 | 5'-TTGTGATGCTTTAGGGAGCC-3'                         | Forward                                 |
|                                 | HK2800 | 5'-ATCCTTTCTCTATCTCACCCTG-3'                       | Reverse                                 |
|                                 | HK3413 | 5'-CATACTATAAATACGTATATATAACAAAG<br>TAACCATCAAG-3' | Reverse 3'-extended<br>unprocessed form |



|              |        |                                       |                                      |
|--------------|--------|---------------------------------------|--------------------------------------|
|              | HK3786 | 5'-AATATTGATCTCAATGTCATCAGCTG-3'      | Reverse over NNS termination site    |
| SNR65        | HK4753 | 5'-ACACAATTTATGCTAGATAGTATCTGAAAG-3'  | Forward                              |
|              | HK4754 | 5'-GTTTCAGAGATTTAAACTGTGCGAAAACACT-3' | Reverse                              |
|              | HK4756 | 5'-CGCCCATAATCAAATCAGCTCATAC-3'       | Reverse over NNS termination site    |
| SNR68        | HK3402 | 5'-ATCATGATGAGCATTATTTTACTGCG-3'      | Forward                              |
|              | HK3403 | 5'-CAGCAAATCTGTTAAGAGTCAATTTCC-3'     | Reverse                              |
|              | HK3411 | 5'-AGTTTTCCAATTTTTTTGTAAGATGAACC-3'   | Reverse 3'-extended unprocessed form |
|              | HK3787 | 5'-GACCATATTATCAAGAGCTTCCTGCT-3'      | Reverse over NNS termination site    |
| SNR128 (U14) | HK4618 | 5'-TCACGGTGATGAAAGACTGGTTC-3'         | Forward                              |
|              | HK4619 | 5'-AAGAGCGGTCACCGAGAGTA-3'            | Reverse                              |
|              | HK5164 | 5'-ACGCATTTTTTAAGCTAGCAGGATTCA-3'     | Reverse over NNS termination site    |
| 18S rRNA     | HK1396 | 5'-CATGGCCGTTCTTAGTTGGTGG-3'          | Forward                              |
|              | HK1397 | 5'-ATTGCCTCAAACCTCCATCGGC-3'          | Reverse                              |
| 21S rRNA     | HK3089 | 5'-AGTTACGCTAGGGATAACAGGG -3'         | Forward                              |
|              | HK3090 | 5'- TGACGAACAGTCAAACCCTTC -3'         | Reverse                              |
| RPL3         | HK829  | 5'-CCAGGTTCTAAGTTCCACAAGCG-3'         | Forward                              |
|              | HK830  | 5'-CCATCTTGAGCGTACTTGGCAG-3'          | Reverse                              |
| ZWF1         | HK3060 | 5'-GGTGAAGCCGATGACTCTAAGG-3'          | Forward                              |
|              | HK3061 | 5'-GGCCAGATAGAAGAGACGGT-3'            | Reverse                              |

**Supplementary Table 6: Primers for digoxigenin labeled RNA probes**

| Target | Number | Sequence                                             | Name              |
|--------|--------|------------------------------------------------------|-------------------|
| SNR13  | HK3303 | 5'-TAATAGGACTCACTATAGGGGAAG TTTTTCCTTTTATATGATG-3'   | Forward antisense |
|        | HK3304 | 5'-GGTCAGATAAAAGTAAAAAAAGGTAGC-3'                    | Reverse antisense |
|        | HK3324 | 5'-GGAAGTTTTTTCCTTTTATATGATG-3'                      | Forward sense     |
|        | HK3325 | 5'-TAATAGGACTCACTATAGGGGTCAGATAAAAGTAAAAAAAGGTAGC-3' | Reverse sense     |
| SNR24  | HK3305 | 5'-TAATAGGACTCACTATAGGTCAAATGATGTAATAACATATTTGC-3'   | Forward antisense |
|        | HK3306 | 5'-TTCATCAGAGATCTTGGTG-3'                            | Reverse antisense |
|        | HK2607 | 5'-TCAAATGATGTAATAACATATTTGC-3'                      | Forward sense     |
|        | HK2608 | 5'-TAATAGGACTCACTATAGGTTTCATCAGAGATCTTGGTG-3'        | Reverse sense     |
| SNR42  | HK3307 | 5'-TAATAGGACTCACTATAGGGATGCTTTAGGGAGCCTATTG-3'       | Forward antisense |
|        | HK3308 | 5'-GGATTACCTCAGCACCAAC-3'                            | Reverse antisense |
|        | HK2605 | 5'-GATGCTTTAGGGAGCCTATTG-3'                          | Forward sense     |
|        | HK2606 | 5'-TAATAGGACTCACTATAGGGGATTACCTCAGCACCAAC-3'         | Reverse sense     |
| SNR68  | HK3309 | 5'-TAATAGGACTCACTATAGGATGATGAGCATTATTTTACTGCGT-3'    | Forward antisense |

|  |        |                                                  |                   |
|--|--------|--------------------------------------------------|-------------------|
|  | HK3310 | 5'-TTTCAGCAAATCTGTTAAGAGTC-3'                    | Reverse antisense |
|  | HK3326 | 5'-ATGATGAGCATTATTTTACTGCGT-3'                   | Forward sense     |
|  | HK3327 | 5'-TAATAGGACTCACTATAGGTTTCAGCAAATCTGTTAAGAGTC-3' | Reverse sense     |

**Supplementary Table 7: Primers labeled with Cy3 dye**

| Target              | Number | Sequence                                                           |
|---------------------|--------|--------------------------------------------------------------------|
| <i>SNR13</i>        | HK3431 | 5'-CY3-GAGTTTTTCCACACCGTTACTGATTTGGCAAAGCCAAACAGCAACTCGA-CY3-3'    |
| <i>SNR17a (U3a)</i> | HK3563 | 5'- CY3-GTTTCTCACTCTGGGGTACAAAGGTTATGGGACTCATCAACCAAGTTGGA-CY3-3'  |
| <i>SNR24</i>        | HK2802 | 5'- CY3-GTGATAATTGGTATGTCTCATTCGGAAGTCAAAGTTCCATCTGAAGTAGC-CY3-3'  |
| <i>SNR42</i>        | HK2801 | 5'- CY3-CGATGGTTTTTAAAGATGGATTACCTCAGCACCAACAGTTACACTATTCGG-CY3-3' |
| <i>SNR68</i>        | HK3562 | 5'- CY3-GCCCCCGTCAATACGATAACGCAGTAAAAT-CY3-3'                      |

**Supplementary Table 8: Primers for analytical PCR**

| Number | Sequence                                                     | Name                                |
|--------|--------------------------------------------------------------|-------------------------------------|
| HK2089 | 5'-ATTGGTGGTTCTATCTTGGC-3'                                   | <i>ACT1</i> forward for 3'-end PCR  |
| HK4375 | 5'- GTTCATCCATGCCATGTGTAATCC-3'                              | 3'-end PCR adapter reverse          |
| HK4683 | 5'-TTTGTATAGTTCATCCATGCCATG<br>TGTAATCCTTTTTTTTTTTTTTTTTC-3' | cDNA for 3'-end PCR with adapter    |
| HK4684 | 5'-TTTGTATAGTTCATCCATGCCATG<br>TGTAATCCTTTTTTTTTTTTTTTTG-3'  | cDNA for 3'-end PCR with adapter    |
| HK4685 | 5'-TTTGTATAGTTCATCCATGCCATG<br>TGTAATCCTTTTTTTTTTTTTTTTIA-3' | cDNA for 3'-end PCR with adapter    |
| HK5334 | 5'-GATGAATATGAGTGCATTTGGCTCGAG-3'                            | <i>SNR13</i> forward for 3'-end PCR |
| HK5539 | 5'-GTGTAAGTGTGGTGCTGAGGTAATCC-3'                             | <i>SNR42</i> forward for 3'-end PCR |

**Supplemental Table 9: Antibodies for western blot and FISH**

| Antibody (organism)           | Dilution (method)      | Source                           |
|-------------------------------|------------------------|----------------------------------|
| Anti-Aco1 (rabbit)            | 1:4000 (western blot)  | U. Mühlenhoff, Marburg (Germany) |
| Anti-Digoxigenin-FITC (sheep) | 1:200 (FISH)           | Roche                            |
| Anti-GFP (mouse)              | 1:5000 (western blot)  | Thermo Fisher Scientific         |
| Anti-GFP (rabbit)             | 1:4000 (western blot)  | ChromoTek GmbH                   |
| Anti-Hem15 (rabbit)           | 1:5000 (western blot)  | U. Mühlenhoff, Marburg (Germany) |
| Anti-Mex67 (rabbit)           | 1:10000 (western blot) | Davids Biotechnology             |
| Anti-mouse IgG-HRP (goat)     | 1:10000 (western blot) | Dianova                          |
| Anti-Nop1 (mouse)             | 1:4000 (western blot)  | Santa Cruz                       |
| Anti-rabbit IgG-HRP (goat)    | 1:10000 (western blot) | Dianova                          |
| Anti-Yra1 (goat)              | 1:2000 (western blot)  | Santa Cruz                       |
| Anti-Zwf1 (rabbit)            | 1:4000 (western blot)  | U. Mühlenhoff, Marburg (Germany) |

## Supplementary References

1. Coban I, Lamping JP, Hirsch AG, et al. dsRNA formation leads to preferential nuclear export and gene expression. *Nature*. 2024;631(8020):432-438. doi:10.1038/s41586-024-07576-w
2. Winston F, Dollard C, Ricupero-Hovasse SL. Construction of a set of convenient *Saccharomyces cerevisiae* strains that are isogenic to S288C. *Yeast*. 1995;11(1):53-55. doi:10.1002/yea.320110107
3. Senger B, Simos G, Bischoff FR, Podtelejnikov A, Mann M, Hurt E. Mtr10p functions as a nuclear import receptor for the mRNA-binding protein Npl3p. *EMBO J*. 1998;17(8):2196-2207. doi:10.1093/emboj/17.8.2196
4. Xiao Z, McGrew JT, Schroeder AJ, Fitzgerald-Hayes M. CSE1 and CSE2, two new genes required for accurate mitotic chromosome segregation in *Saccharomyces cerevisiae*. *Mol Cell Biol*. 1993;13(8):4691-4702. doi:10.1128/mcb.13.8.4691
5. Conrad NK, Wilson SM, Steinmetz EJ, et al. A yeast heterogeneous nuclear ribonucleoprotein complex associated with RNA polymerase II. *Genetics*. 2000;154(2):557-571. doi:10.1093/genetics/154.2.557
6. Segref A, Sharma K, Doye V, et al. Mex67p, a novel factor for nuclear mRNA export, binds to both poly(A)<sup>+</sup> RNA and nuclear pores. *EMBO J*. 1997;16(11):3256-3271. doi:10.1093/emboj/16.11.3256
7. Klama S, Hirsch AG, Schneider UM, Zander G, Seel A, Krebber H. A guard protein mediated quality control mechanism monitors 5'-capping of pre-mRNAs. *Nucleic Acids Res*. 2022;50(19):11301-11314. doi:10.1093/nar/gkac952
8. Li Z, Vizeacoumar FJ, Bahr S, et al. Systematic exploration of essential yeast gene function with temperature-sensitive mutants. *Nat Biotechnol*. 2011;29(4):361-367. doi:10.1038/nbt.1832
9. Spiller MP, Boon KL, Reijns MAM, Beggs JD. The Lsm2-8 complex determines nuclear localization of the spliceosomal U6 snRNA. *Nucleic Acids Res*. 2007;35(3):923-929. doi:10.1093/nar/gkl1130
10. Hirsch AG, Becker D, Lamping J-P, Krebber H. Unraveling the stepwise maturation of the yeast telomerase including a Cse1 and Mtr10 mediated quality control checkpoint. *Sci Rep*. 2021;11(1):22174. doi:10.1038/s41598-021-01599-3
11. Sikorski RS, Hieter P. A system of shuttle vectors and yeast host strains designed for efficient manipulation of DNA in *Saccharomyces cerevisiae*. *Genetics*. 1989;122(1):19-27.
12. Gilbert W, Siebel CW, Guthrie C. Phosphorylation by Sky1p promotes Npl3p shuttling and mRNA dissociation. *RNA*. 2001;7(2):302-313. doi:10.1017/s1355838201002369
13. Wang X, Guo J, Li J, Krebber H. Initial spliceosomal U4 / U6 di-snRNA formation occurs in the cytoplasm of *Saccharomyces cerevisiae* and requires a guard protein mediated quality control. *Nucleic Acids Res*. 2026;54. doi:10.1093/nar/gkaf1500
